# Supplementary material for: Development of hollow ferrogadolinium nanonetworks for dual-modal MRI guided cancer chemotherapy
Source: Royal Society of Chemistry journal article supplement (doi:10.1039/c8ra09102a), 2019-01-01
Supplement: c8ra09102a1.pdf [file c8ra09102a1.pdf]

## Supporting Information

### **Development of hollow ferrogadolinium nanonetworks for dual-modal MRI guided cancer chemotherapy**

Ting Tang,<sup>a,b,#</sup> Xiao Sun,<sup>\*,c,#</sup> Xuedong Xu,<sup>d,#</sup> Yifeng Bian,<sup>a</sup> Xiaojie Ma,<sup>a</sup> Ning Chen<sup>\*,a</sup>

<sup>a</sup> Jiangsu Key Laboratory of Oral Diseases, Nanjing Medical University, Nanjing, 210029, China

<sup>b</sup> Department of dental implantology, Hefei Stomatology Hospital, Clinical School of Anhui Medical University, Hefei, 230001, China

<sup>c</sup> Department of Chemical and Biomolecular Engineering, National University of Singapore, Singapore 117585, Singapore

<sup>d</sup> China Shijiazhuang Pharmaceutical Company, Shijiazhuang, 050038, China

<sup>#</sup> These authors contributed equally to this work and should be considered as co-first authors.

\*Corresponding author: E-mail: [xiaosun8000@163.com](mailto:xiaosun8000@163.com) (X. Sun);  
[dentistchenning@126.com](mailto:dentistchenning@126.com) (N. Chen)

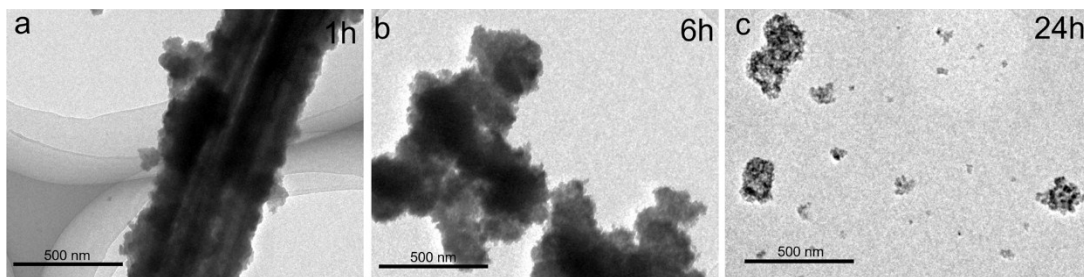

Figure S1. Time-dependent growth process of the nanoparticles.

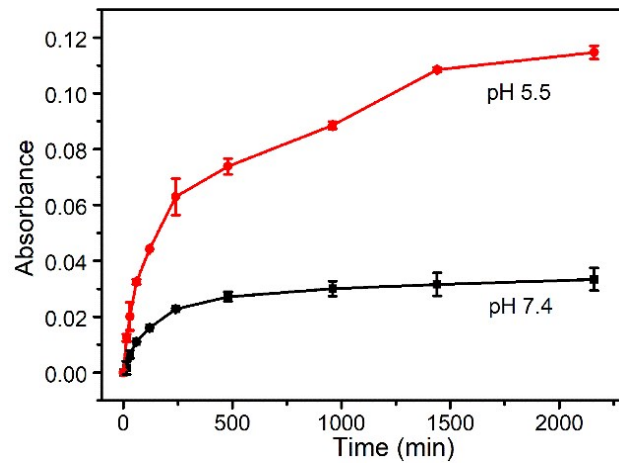

Figure S2. Release behavior of drugs from HPFNC under different pH conditions.
